# Supplementary material
Source: PubMed Central journal article supplement (PMC4860050)

**Supplemental Figure 1:** Manufacturing methods of virus-directed T-cells. 1. EBV-specific T-cells were produced by serial stimulation of peripheral blood mononuclear cells (PBMC) with donor-derived, irradiated EBV-lymphoblastoid cells (EBV-LCL) over 5-6 stimulations. 2. Multivirus-specific T-cells were produced using EBV-LCL that were virally transduced with a Ad5f35-pp65 vector for three stimulations. 3. Multivirus-specific T-cells were produced from cord blood mononuclear cells (CBMC) using donor-derived dendritic cells (DC) that were virally transduced with a Ad5f35-pp65 vector, followed by two stimulations with Ad5f35-pp65 transduced, irradiated EBV-LCL. 4. Multivirus-specific T-cells were produced using a rapid protocol with stimulation of PBMC with peptide pools encompassing viral epitopes (against CMV, EBV, adenovirus, +/- HHV6 and BK virus) in a single stimulation, followed by 10-12 days of culture in a Grex-10 culture device.

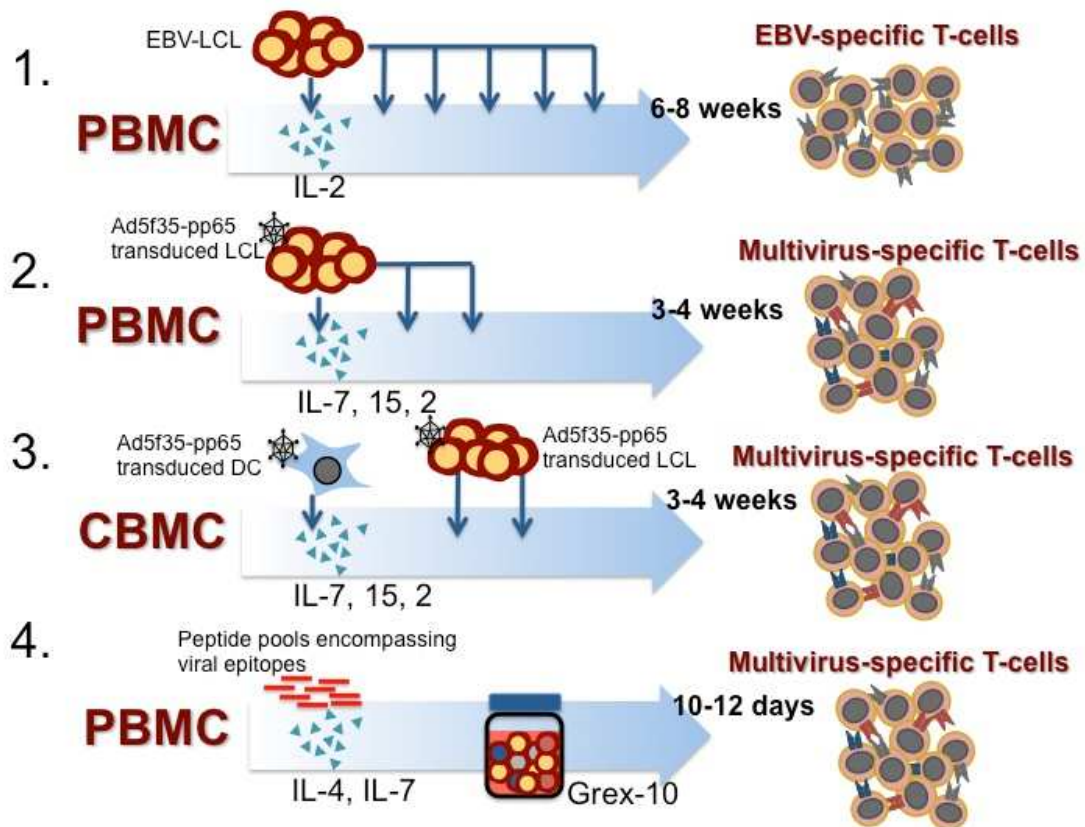

Supplement: NIHMS754303-supplement-supplement_1.pdf [file NIHMS754303-supplement-supplement_1.pdf]
